# Supplementary material for: Thin platelet-like COF nanocomposites for blood brain barrier transport and inhibition of brain metastasis from renal cancer
Source: Royal Society of Chemistry journal article supplement (doi:10.1039/d0tb00724b), 2020-01-01
Supplement: d0tb00724b1.pdf [file d0tb00724b1.pdf]

## Electronic Supplementary Material

# Thin platelet- like COF Nanocomposites for Blood Brain Barrier Transport and Inhibition of Brain Metastasis from Renal Cancer

Guiyang Zhang<sup>a,d,#</sup>, Bo Jiang<sup>b,#</sup>, Chunyong Wu<sup>c,#</sup>, Yanfeng Liu<sup>a</sup>, Yidan He<sup>c</sup>, Xin Huang<sup>a</sup>, Wei Chen<sup>b</sup>, Kai Xi<sup>\*a</sup>, Hongqian Guo<sup>\*b</sup>, Xiaozhi Zhao<sup>\*b</sup>, and Xudong Jia<sup>\*a</sup>

<sup>a</sup> School of Chemistry and Chemical Engineering, Nanjing University, Jiangsu 210023, China

<sup>b</sup> Department of Urology, Drum Tower Hospital, Medical School of Nanjing University, Institute of Urology, Nanjing University, 321 Zhongshan Road, Nanjing, 210008, Jiangsu, PR China

<sup>c</sup> Department of Pharmaceutical Analysis, China Pharmaceutical University, Nanjing 210009, China

<sup>d</sup> Department of Pharmacology, School of Basic Medical Sciences, Anhui Medical University, Hefei 230032, China

<sup>#</sup> These authors contributed equally to this work.

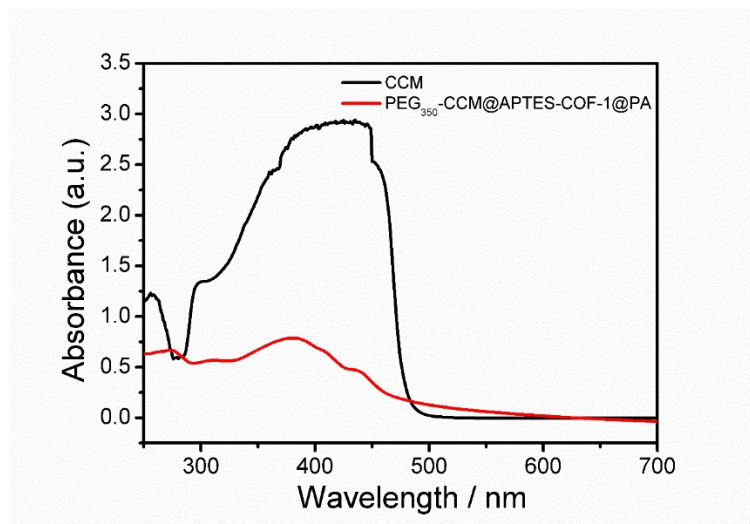

**Figure S1.** UV-vis spectra of the COF-based materials in methanol solution.

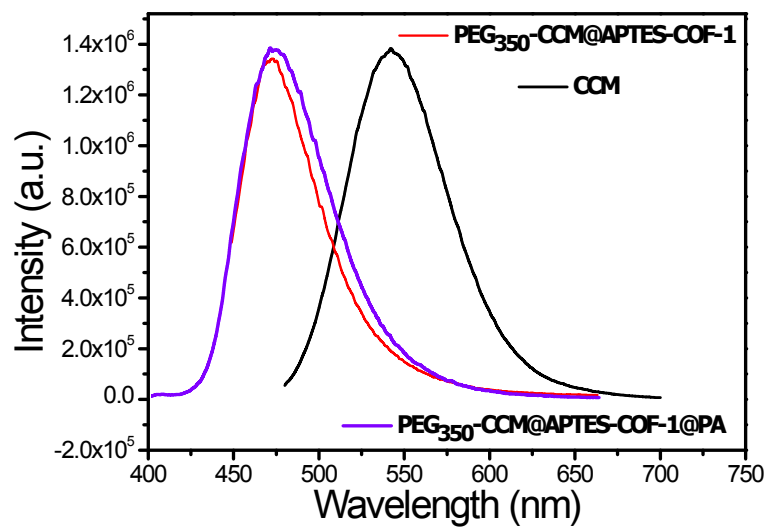

**Figure S2.** PL spectra of free CCM (black solid line) and PEG<sub>350</sub>-CCM@APTES-COF-1@PA (red solid line).

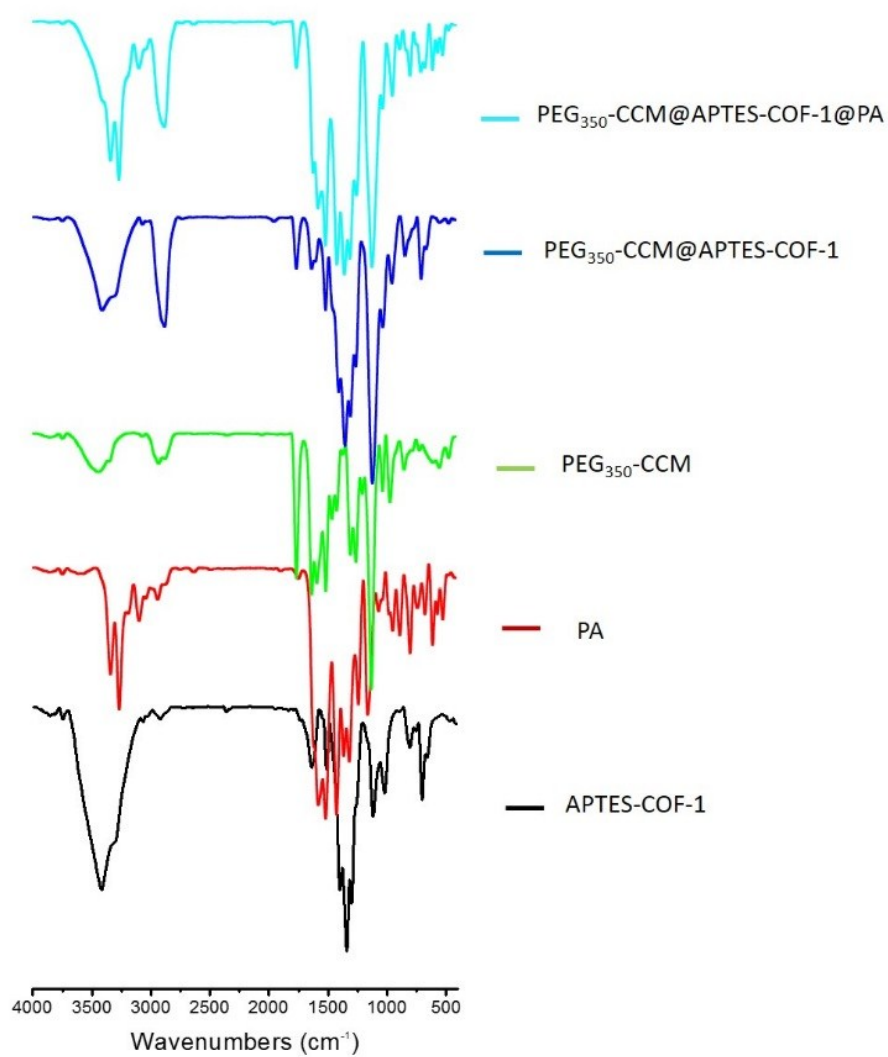

**Figure S3.** FT-IR spectra of APTES-COF-1, PA, PEG<sub>350</sub>-CCM, PEG<sub>350</sub>-CCM@APTES-COF-1, and PEG<sub>350</sub>-CCM@APTES-COF-1@PA.

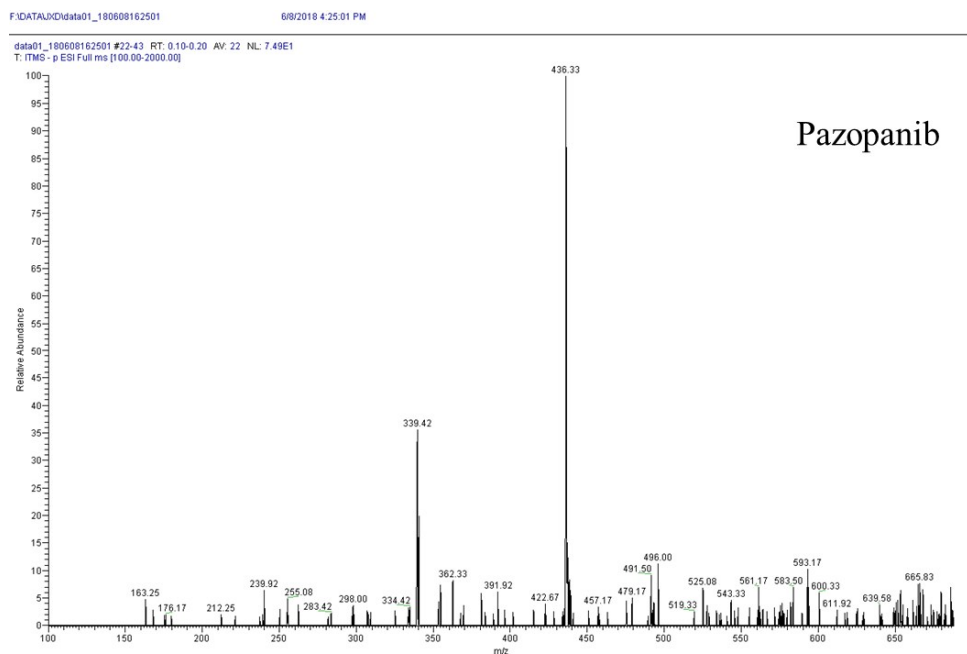

**Figure S4.** ESI-MS spectra of PA monomer.

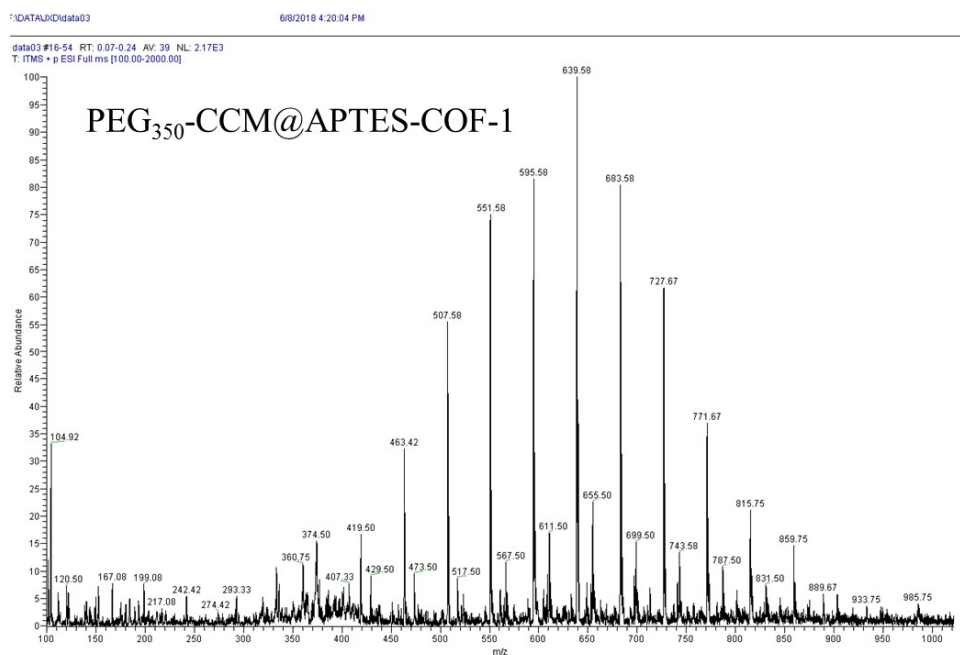

**Figure S5.** ESI-MS spectra of PEG<sub>350</sub>-CCM@APTES-COF-1 monomer.

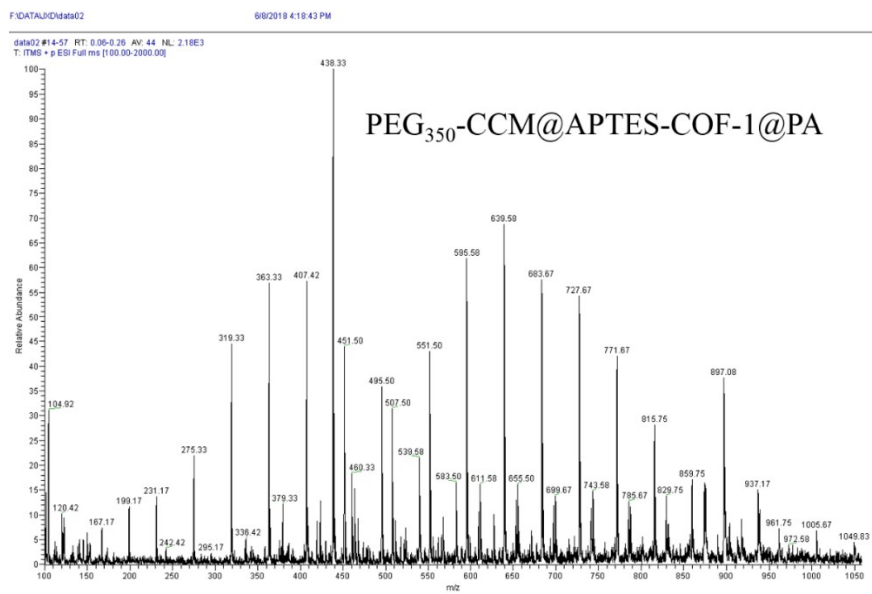

**Figure S6.** ESI-MS spectra of PEG<sub>350</sub>-CCM@APTES-COF-1@PA monomer.

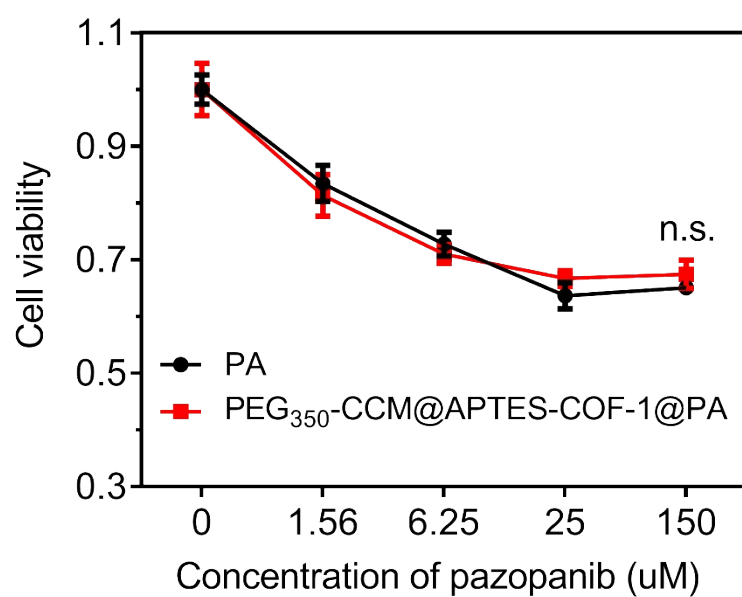

**Figure S7.** Cytotoxicity of PEG<sub>350</sub>-CCM@APTES-COF-1@PA against renal cells (Renca) after 48 h- incubation at different concentrations. Error bars indicate s.d. (n=4). n.s.  $P > 0.05$ .

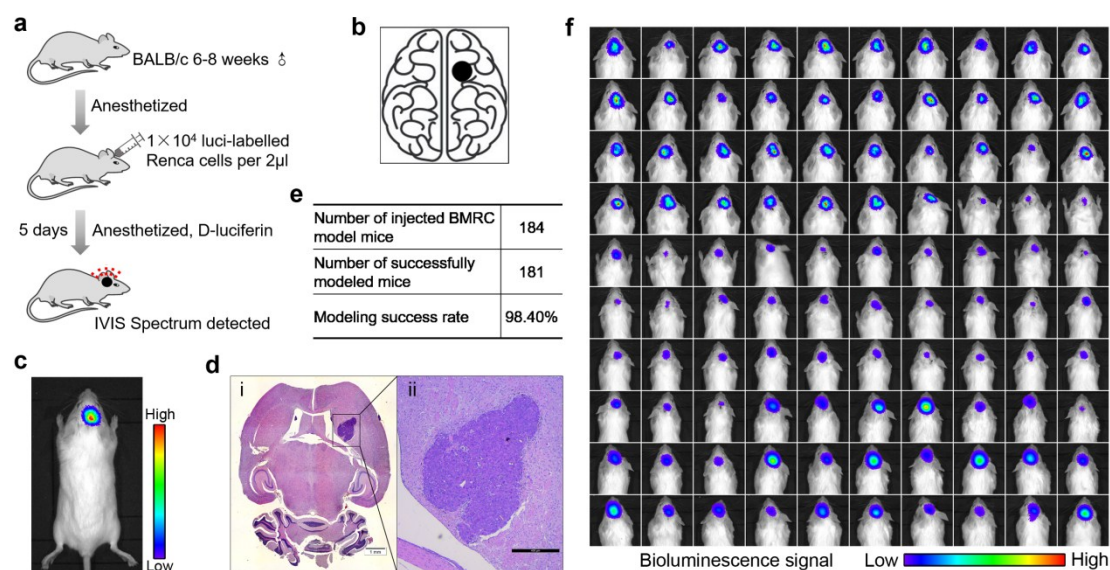

**Figure S8. Establishment and verification of the intracranial BMRC model.** **a** Schematic illustration of the construction of the intracranial BMRC model; **b** schematic diagram of the puncture point in the mouse brain; **c** representative bioluminescence image of one successfully established BMRC model five days after intracranial injection; **d** histopathological (H&E-stained) section of renal cancer cell growth in brain on the cross section (scale bars: (i)  $1000 \mu\text{m}$  and (ii)  $400 \mu\text{m}$ ); **e** statistical results of the BMRC model established in this study; **f** One hundred different representative *in vivo* bioluminescence images of successfully established BMRC mice (Statistics of 100 mice).



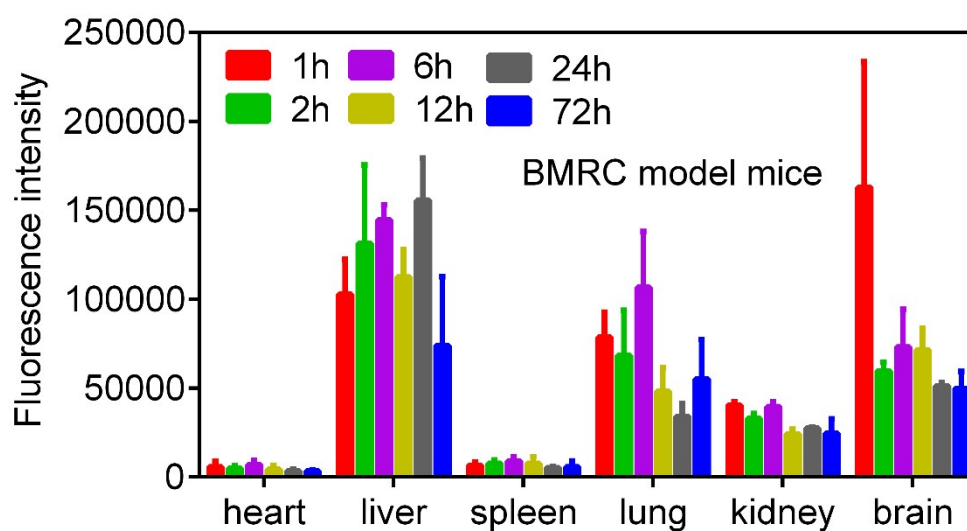

**Figure S9.** Region-of-interest analyses of absolute fluorescent signals from the BMRC mice. Tail injection into the mice was at a single sample dose of  $50 \text{ mg kg}^{-1}$  in PBS. Error bars indicate s.d. (n=2-3 independent experiments).

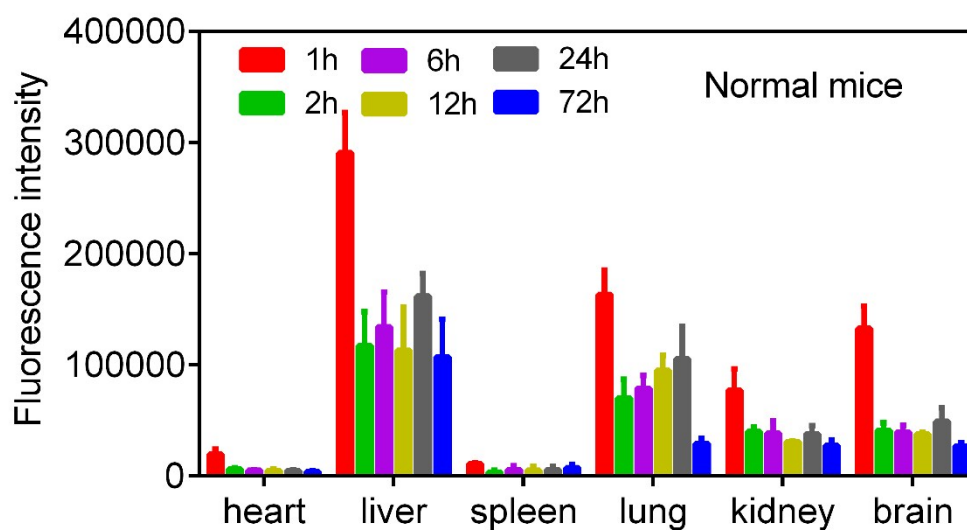

**Figure S10.** Region-of-interest analyses of absolute fluorescent signals from the normal mice. Tail injection into the mice was at a single sample dose of  $50 \text{ mg kg}^{-1}$  in PBS. Error bars indicate s.d. (n=2-3 independent experiments).

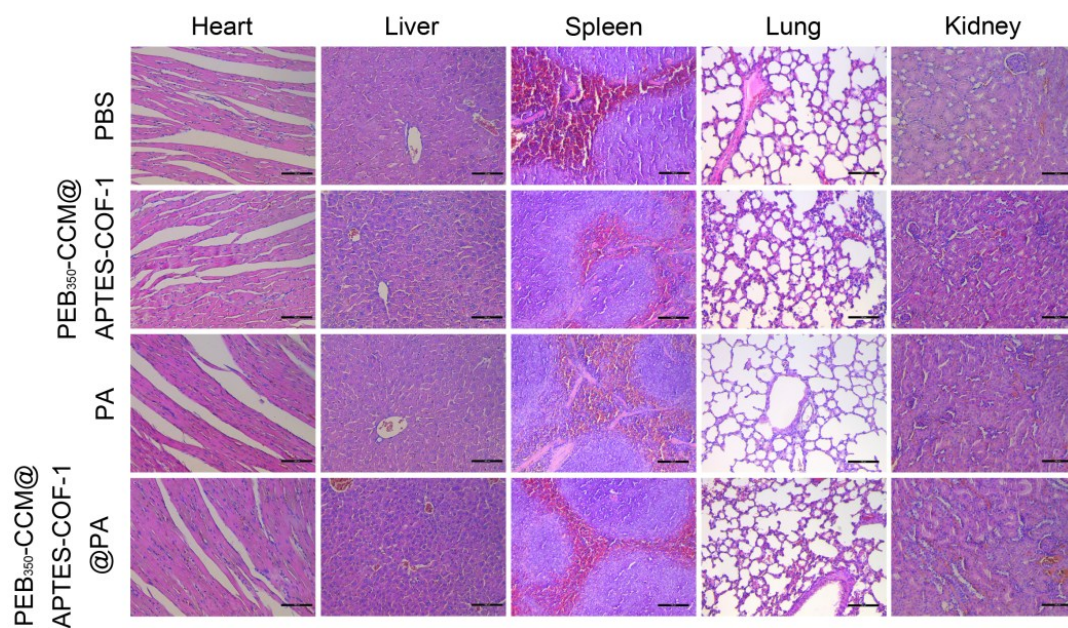

**Figure S11. Biosafety analysis of PA-loaded naocomposites in tumor-bearing mice.**

Pathological analysis of the H&E-stained main organs sections of mice treated with PBS, PEG<sub>350</sub>-CCM@APTES-COF-1, PA, and PEG<sub>350</sub>-CCM@APTES-COF-1@PA. No significant pathological change was observed in all of the organs. For all images: scale bar represents 100 µm.

**Figure S12.** Assay of PEG<sub>350</sub>-CCM@APTES-COF-1@PA

| Sample Name |                                            | Internal<br>standard peak<br>area (Ai) | API peak<br>area (As) | As/Ai | Average | Sample<br>weight<br>(g) | Injection<br>concentration<br>( $\mu\text{g ml}^{-1}$ ) | PA<br>content<br>calculation | Average |
|-------------|--------------------------------------------|----------------------------------------|-----------------------|-------|---------|-------------------------|---------------------------------------------------------|------------------------------|---------|
| Samples     | PEG <sub>350</sub> -CCM@APTES-COF-1@PA-1-1 | 496014                                 | 3993540               | 8.05  | -       | 0.0100                  | -                                                       | 46.05%                       | 45.83%  |
|             | PEG <sub>350</sub> -CCM@APTES-COF-1@PA-1-2 | 495851                                 | 3984327               | 8.04  |         | 0.0100                  | -                                                       | 45.96%                       |         |
|             | PEG <sub>350</sub> -CCM@APTES-COF-1@PA-2-1 | 497942                                 | 3979699               | 7.99  |         | 0.0100                  | -                                                       | 45.72%                       |         |
|             | PEG <sub>350</sub> -CCM@APTES-COF-1@PA-2-2 | 498436                                 | 3974442               | 7.97  |         | 0.0100                  | -                                                       | 45.61%                       |         |
| Control     | PA-1-1                                     | 502213                                 | 4407382               | 8.78  | 8.74    | 0.0100                  | 50                                                      | -                            | -       |
|             | PA-1-2                                     | 502289                                 | 4401708               | 8.76  |         | 0.0100                  | 50                                                      | -                            | -       |
|             | PA-2-1                                     | 504576                                 | 4398433               | 8.72  |         | 0.0100                  | 50                                                      | -                            | -       |
|             | PA-2-2                                     | 505471                                 | 4402298               | 8.71  |         | 0.0100                  | 50                                                      | -                            | -       |
